# Supplementary material for: Construction of highly durable electrocatalysts by pore confinement and anchoring effect for the oxygen reduction reaction
Source: Royal Society of Chemistry journal article supplement (doi:10.1039/d1nj06098h), 2022-01-01
Supplement: d1nj06098h1.pdf [file d1nj06098h1.pdf]

**Supporting information for**  
**Construction of highly durable electrocatalysts by pore-confinement and**  
**anchoring effect for oxygen reduction reaction**

Anyong Chen <sup>a,b,†</sup>, Jiajia Lu <sup>a,†</sup>, Hongwei Zhu <sup>a</sup>, Hongxia Zhang <sup>a</sup>, Shaojuan Zeng <sup>e</sup>,  
Lirong Zheng <sup>c,\*</sup>, Han-Pu Liang <sup>a,b,d,\*</sup>

<sup>a</sup> Qingdao Institute of Bioenergy and Bioprocess Technology, Chinese Academy of Sciences,  
Qingdao 266101, China

<sup>b</sup> Center of Materials Science and Optoelectronics Engineering, University of Chinese  
Academy of Sciences, Beijing 100049, China

<sup>c</sup> Beijing Synchrotron Radiation Facility, Institute of High Energy Physics, Chinese Academy  
of Sciences, Beijing 100049, China

<sup>d</sup> Dalian National Laboratory for Clean Energy, Chinese Academy of Sciences, Dalian  
116023, China

<sup>e</sup> Institute of Process Engineering, Chinese Academy of Sciences, Beijing 100190, China

\* Corresponding Authors E-mails: zhenglr@ihep.ac.cn (L. Zheng); lianghp@qibebt.ac.cn (H-  
P. Liang)

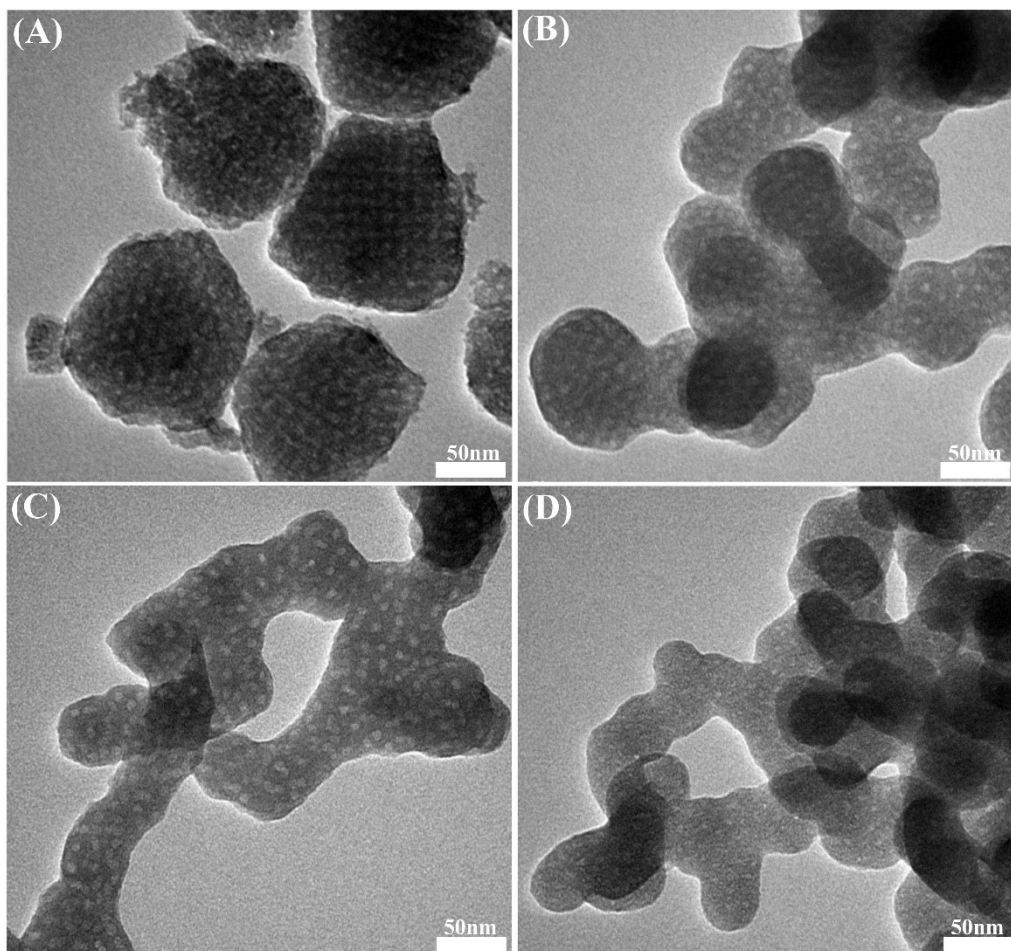

**Figure S1.** TEM images of porous carbon (PC) precursor with various amount of phytic acid (PA): (A) 0 ml (B) 0.1 ml (C) 0.2 ml and (D) 0.3 ml.

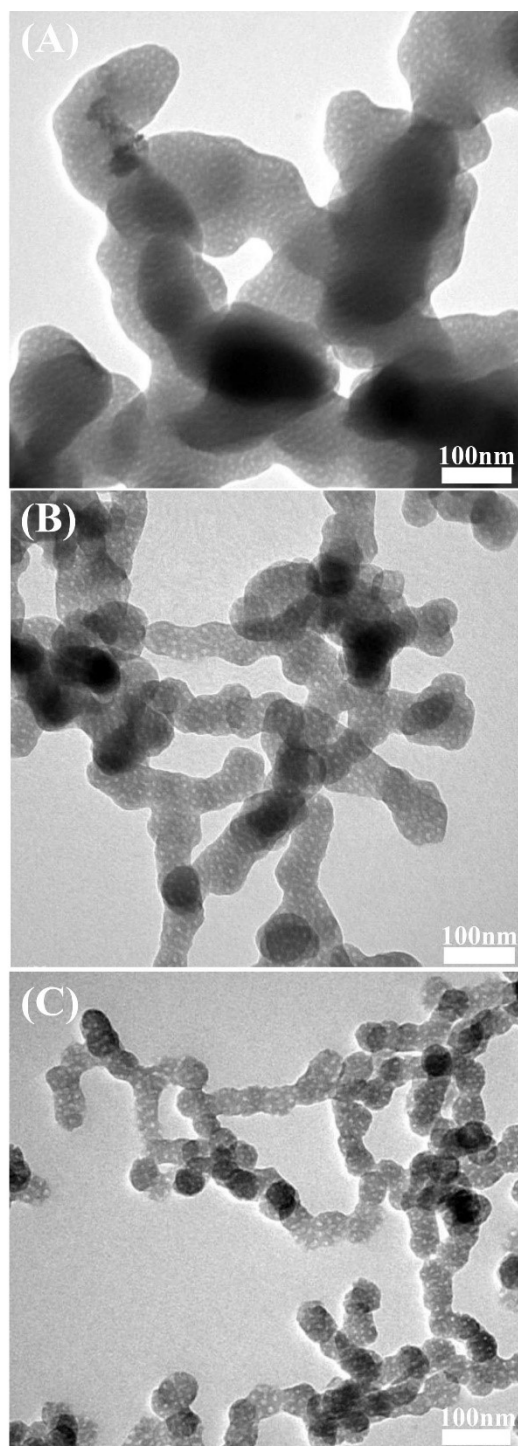

**Figure S2.** TEM images of PC precursor composite with various amount of F127: (A) 1 g (B) 1.5 g and (C) 2 g.

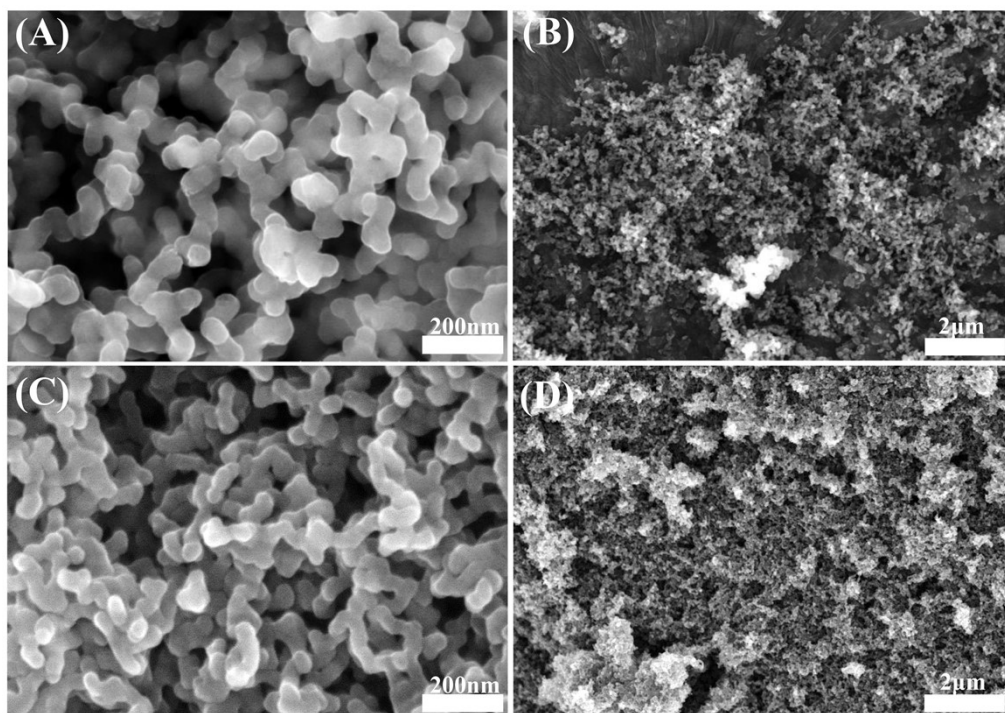

**Figure S3.** SEM images of (A, B) PC precursor and (C, D) PC.

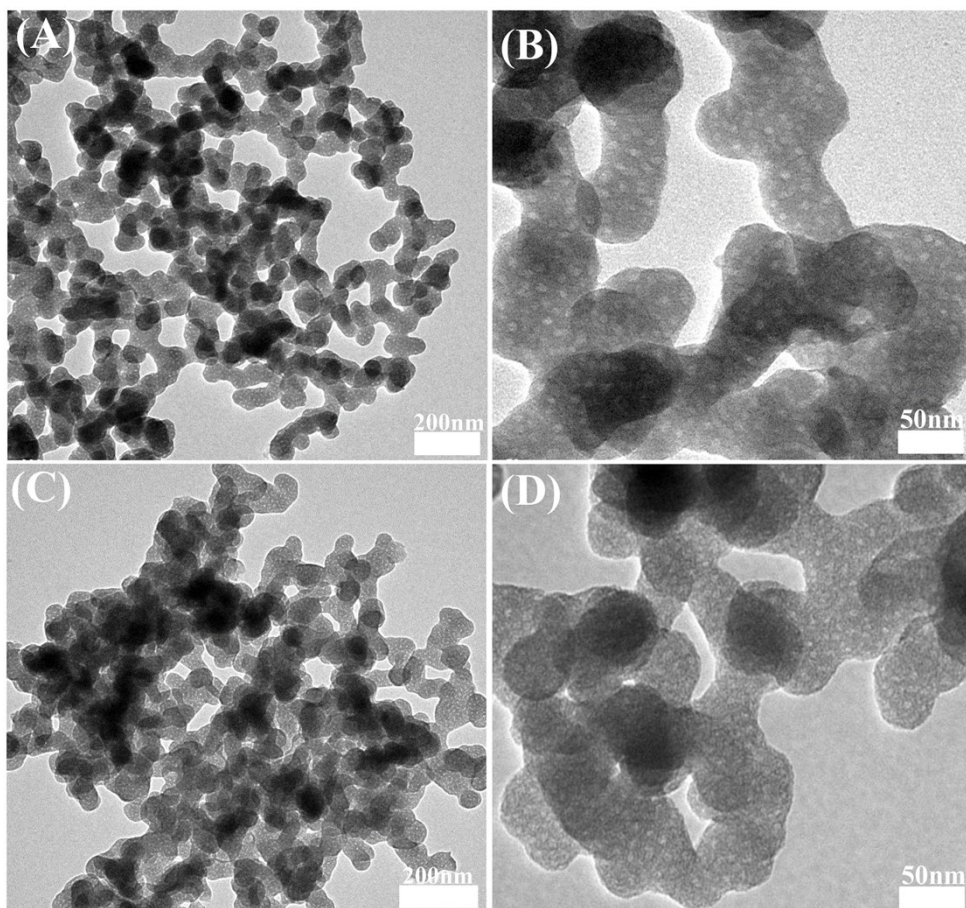

**Figure S4.** TEM images of (A, B) PC precursor, (C, D) PC.

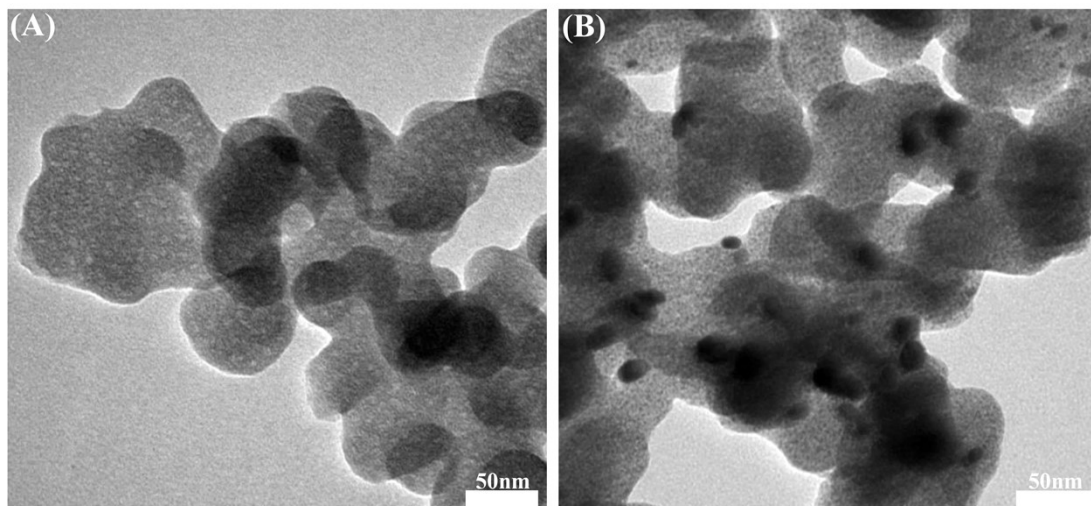

**Figure S5.** TEM images of (A) Pt-PC-200, (B) Pt-PC-400.

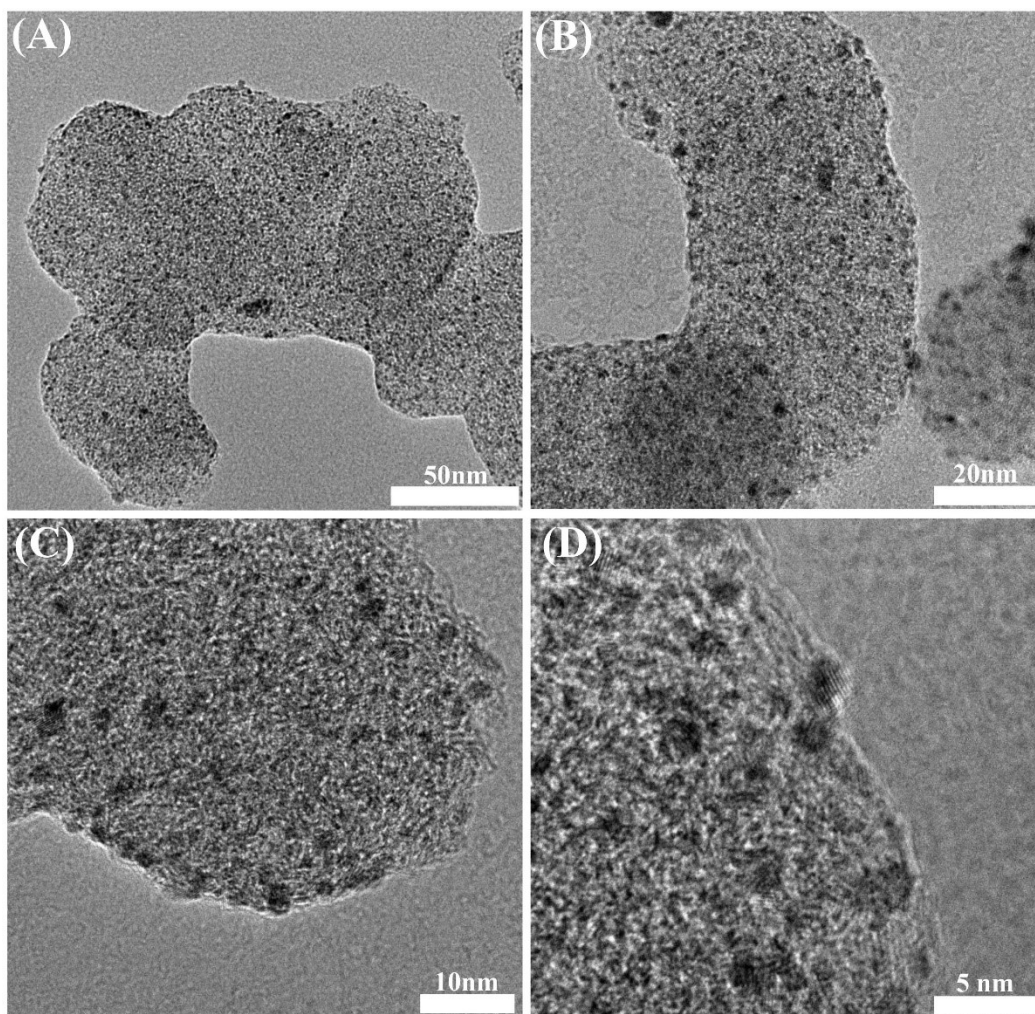

**Figure S6.** HRTEM images of the Pt-PC-300.



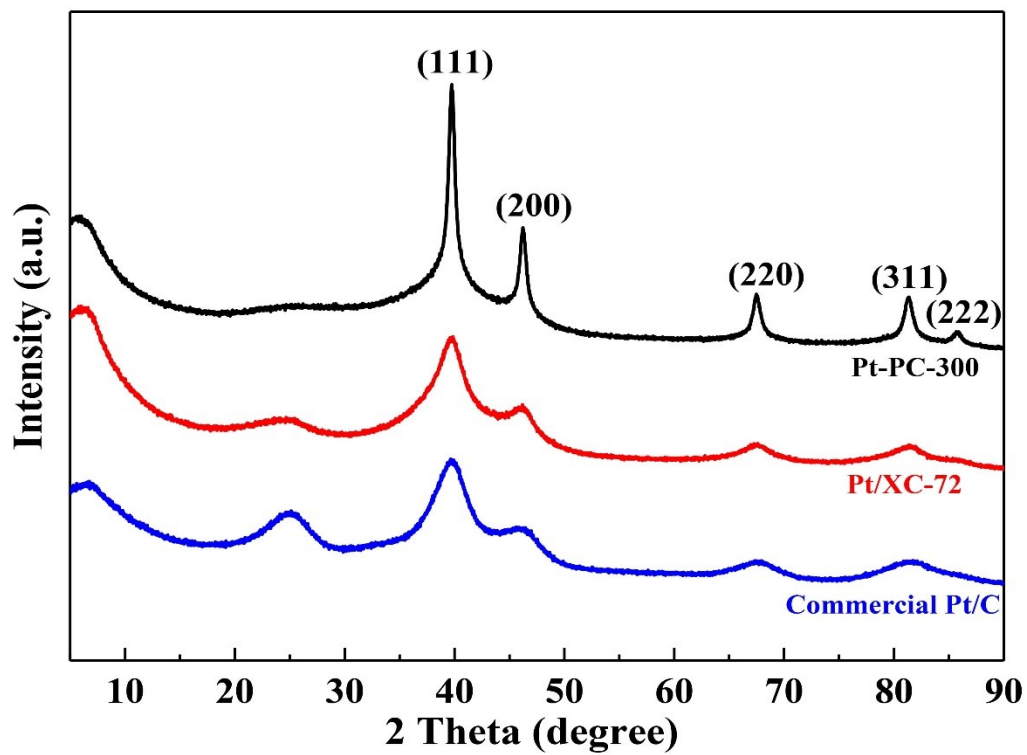

Figure S7. XRD patterns of Pt-PC-300, Pt/XC-72 and commercial Pt/C.



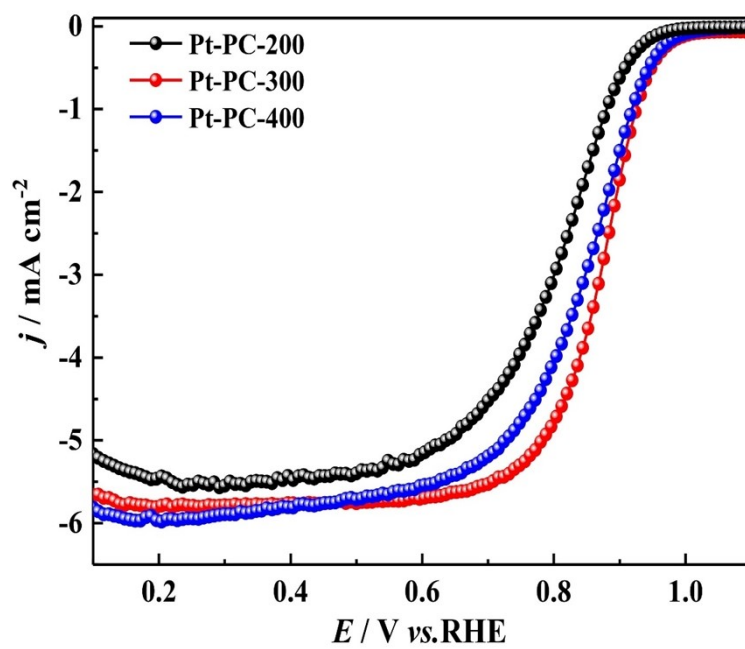

**Figure S8.** LSV curves of Pt-PC-200, Pt-PC-300 and Pt-PC-400 in 0.1 M HClO<sub>4</sub> aqueous solution.

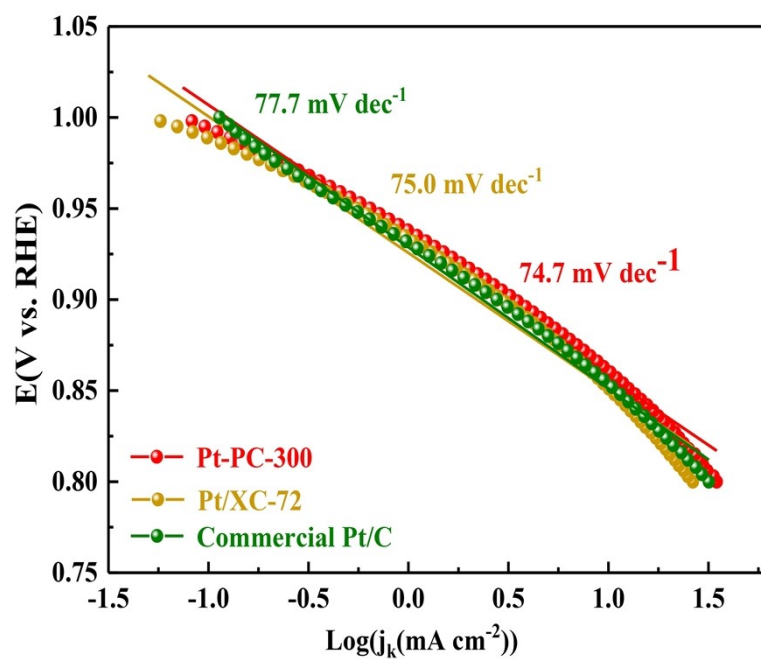

**Figure S9.** Tafel plots of Pt-PC-300, Pt/XC-72 and commercial Pt/C.

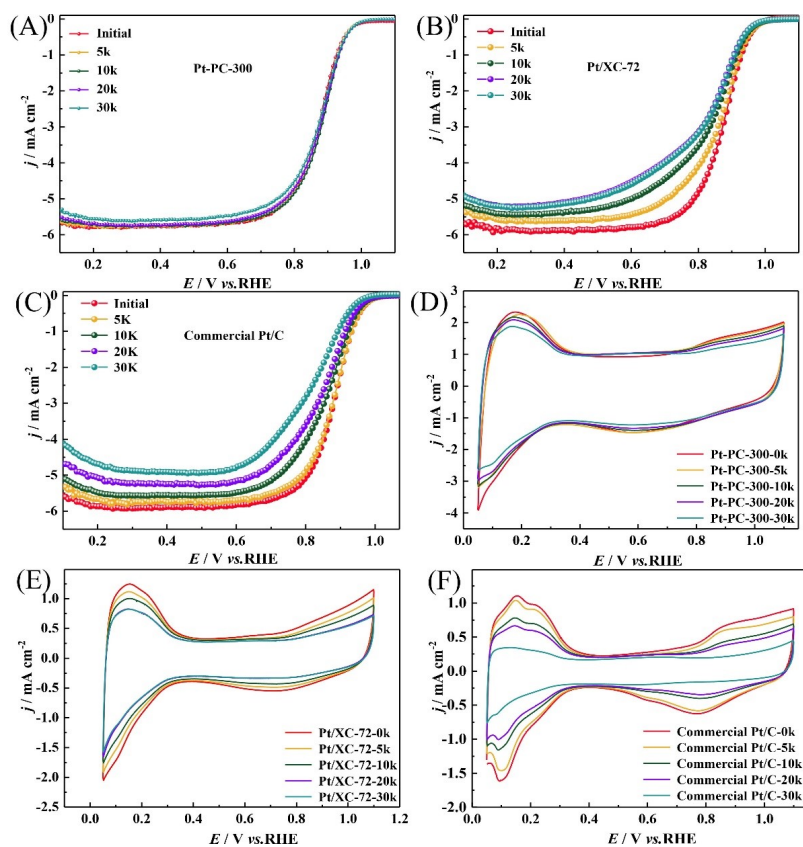

**Figure S10.** (A-C) LSV curves of Pt-PC-300, Pt/XC-72 and commercial Pt/C in O<sub>2</sub>-saturated 0.1 M HClO<sub>4</sub> aqueous solution at different cycles. (D-F) The corresponding CV curves for the prepared catalysts in N<sub>2</sub>-saturated 0.1 M HClO<sub>4</sub> aqueous solution.

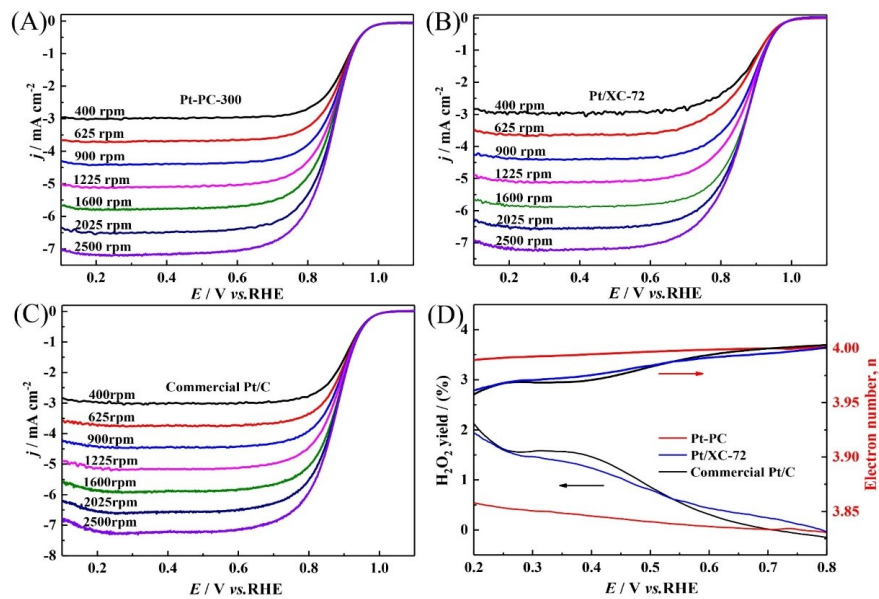

**Figure S11.** LSV curves of (A) Pt-PC-300, (B) Pt/XC-72 and (C) commercial Pt/C at different rotation speeds. (D) Corresponding electron transfer number ( $n$ ) and H<sub>2</sub>O<sub>2</sub> yield of Pt-PC-300, Pt/XC-72 and commercial Pt/C.

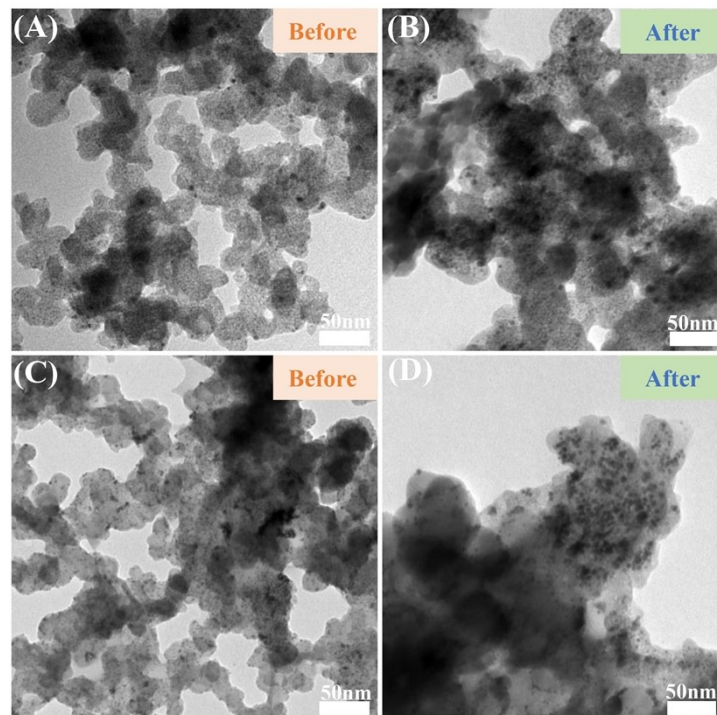

**Figure S12.** TEM images of (A, B) Pt/XC-72 and (C, D) commercial Pt/C before and after stability testing.

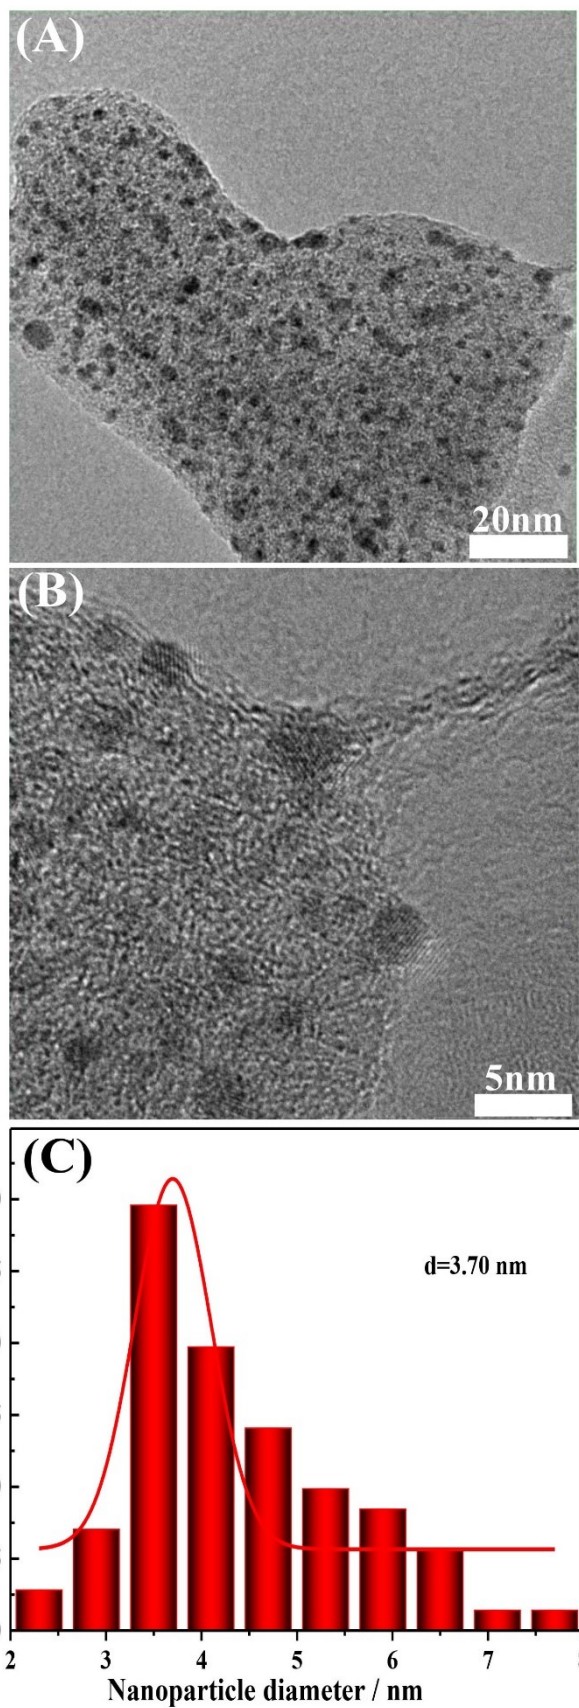

**Figure S13.** (A, B) HRTEM images and (C) the corresponding particle size distribution of Pt-PC-300 after stability testing.

**Table S1.** The contents of C, N, O, P and Pt in Pt-PC-300 from XPS.

| Element        | C     | N    | O    | P    | Pt   |
|----------------|-------|------|------|------|------|
| Content (at %) | 82.17 | 3.68 | 9.74 | 0.66 | 3.75 |

**Table S2.** EXAFS fitting parameters at the Pt L<sub>3</sub>-edge for various samples.

| Sample    | Shell | N <sup>a</sup> | R (Å) <sup>b</sup> | $\sigma^2$ (Å <sup>2</sup> ·10 <sup>-3</sup> ) <sup>c</sup> | $\Delta E_0$ (eV) <sub>d</sub> | R factor (%) |
|-----------|-------|----------------|--------------------|-------------------------------------------------------------|--------------------------------|--------------|
| Pt-PC-300 | Pt-O  | 2.8            | 2.02               | 5.6                                                         | 11.1                           | 0.9          |
|           | Pt-Pt | 2.6            | 2.78               | 5.9                                                         | 14.7                           |              |

a) N: coordination numbers; b) R: bond distance; c)  $\sigma^2$ : Debye-Waller factors; d)  $\Delta E_0$ : the inner potential correction. e) R factor: goodness of fit. f)  $S_0^2$  were set as 0.84/0.90 for Pt-O/Pt-Pt, which were obtained from the experimental EXAFS fit of reference PtO<sub>2</sub>/Pt foil by fixing CN as the known crystallographic value and was fixed to all the samples<sup>1-3</sup>.



**Table S3.** The initial  $E_{1/2}$  (V) of Pt-PC-300 at different temperature.

| Catalysts     | Pt-PC-200 | Pt-PC-300 | Pt-PC-400 |
|---------------|-----------|-----------|-----------|
| $E_{1/2}$ (V) | 0.802     | 0.871     | 0.848     |

**Table S4.** Comparison of  $E_{1/2}$  (V) among different catalysts in 0.1 M HClO<sub>4</sub>.

| Catalysts       | Initial | 5k    | 10k   | 20k   | 30k   | After 30k |
|-----------------|---------|-------|-------|-------|-------|-----------|
| Pt/XC-72        | 0.872   | 0.859 | 0.835 | 0.812 | 0.813 | -0.059    |
| Commercial Pt/C | 0.880   | 0.878 | 0.853 | 0.834 | 0.787 | -0.093    |
| Pt-PC-300       | 0.871   | 0.874 | 0.881 | 0.876 | 0.877 | +0.006    |

**Table S5.** Comparison of Mass Activity ( $\text{mA mg}_{\text{Pt}}^{-1}$ ) of the synthesized catalysts.

| Catalysts       | Initial | 5k     | 10k    | 20k    | 30k    | Change (%) |
|-----------------|---------|--------|--------|--------|--------|------------|
| Pt/XC-72        | 114.92  | 84.4   | 70.27  | 58.02  | 60.34  | -47.5      |
| Commercial Pt/C | 113.56  | 112.94 | 59.50  | 59.27  | 34.12  | -67.0      |
| Pt-PC-300       | 107.29  | 112.80 | 142.91 | 130.93 | 120.77 | +12.6      |

**Table S6.** Comparison of ECSA ( $\text{m}^2 \text{g}^{-1}$ ) of the synthesized catalysts at different cycles.

| Catalysts       | Initial | 5k    | 10k   | 20k   | 30k   | Change (%) |
|-----------------|---------|-------|-------|-------|-------|------------|
| Pt/XC-72        | 53.23   | 46.65 | 41.56 | 32.64 | 31.52 | -40.8      |
| Commercial Pt/C | 52.58   | 48.53 | 34.19 | 28.81 | 10.32 | -80.4      |
| Pt-PC-300       | 80.40   | 69.86 | 65.67 | 60.48 | 50.77 | -36.9      |

**Table S7.** Mass activity, ECSA and Tafel slops of Pt-PC-300 for ORR in this work and several results of representative Pt based catalysts from recent published work.

| Catalysts                                 | $E_{1/2}$<br>(V) | Pt loading<br>( $\mu\text{g}_{\text{Pt}}\text{cm}^{-2}$ ) | Mass activity<br>( $\text{mA}\mu\text{g}_{\text{Pt}}^{-1}$ )<br>(0.9V) | The retention<br>rate of MA<br>(30k) | ECSA<br>( $\text{m}^2/\text{g}$ )<br>(0.9V) | Tafel slops<br>( $\text{mV dec}^{-1}$ ) | Ref       |
|-------------------------------------------|------------------|-----------------------------------------------------------|------------------------------------------------------------------------|--------------------------------------|---------------------------------------------|-----------------------------------------|-----------|
| Pt/MWCNT                                  | 0.862            | 50                                                        | 58.8                                                                   | 52.38%                               | 56.4                                        | 70                                      | [4]       |
| Pt/MU-<br>MWCNT                           | 0.915            | 50                                                        | 174.5                                                                  | 63.32%                               | 103.4                                       | 63                                      | [4]       |
| Pt/C-JM                                   | 0.89             | 50                                                        | 92.4                                                                   | 96.96%                               | 77.8                                        | 63                                      | [4]       |
| Pt-<br>TNT/FAB                            | 0.79             | 20                                                        | 37.5                                                                   | -                                    | 49.6                                        | 64                                      | [5]       |
| Pt NAs                                    | 0.839            | 200                                                       | 12.4(0.85V)                                                            | -                                    | 47.7(0.85V)                                 | -                                       | [6]       |
| Pt/NS-Ti <sub>4</sub> O <sub>7</sub>      | -                | 96                                                        | 22.33(0.85V)                                                           | 59.61%(3k)                           | 58.7(0.85V)                                 | -                                       | [7]       |
| Pt/RGO <sub>1</sub> -<br>FCB <sub>2</sub> | 0.886            | 180                                                       | 249                                                                    | -                                    | 62.1                                        | -                                       | [8]       |
| Pt-Ni/<br>graphene                        | 0.77             | 40                                                        | 0.14(0.8V)                                                             | -                                    | 0.31(0.8V)                                  | -                                       | [9]       |
| Pt<br>nanoplates                          | 0.847            | -                                                         | 449                                                                    | 82.1%(5k)                            | 25.6                                        | -                                       | [10]      |
| Pt-PC-300                                 | 0.881            | 25.4                                                      | 142.91                                                                 | 112.6%                               | 80.40                                       | 74.7                                    | This work |

## References

- [1] Ravel, B.; Newville, M. ATHENA, ARTEMIS, HEPHAESTUS: data analysis for X-ray absorption spectroscopy using IFEFFIT. *Journal of synchrotron radiation* 12 (2005) 537-541 <https://doi.org/10.1107/s0909049505012719>.
- [2] Bouwens, S. M. A. M.; Koningsberger, D. C.; de Beer, V. H. J.; Prins, R. The structure of the cobalt sulfide phase in carbon-supported co and co-mo sulfide catalysts as studied by exafs and xanes. *Catalysis Letters* 1 (1988) 55-59 <https://doi.org/10.1007/bf00765354>.
- [3] Rehr, J. J.; Albers, R. C. Theoretical approaches to x-ray absorption fine structure. *Reviews of Modern Physics* 72 (2000) 621-654 <https://doi.org/10.1103/RevModPhys.72.621>.
- [4] Shu, Q. Z.; Xia, Z. X.; Wei, W.; Xu, X. L.; Sun, R. L.; Deng, R. Y.; Yang, Q. H.; Zhao, H.; Wang, S. L.; Sun, G. Q. Controllable Unzipping of Carbon Nanotubes as Advanced Pt Catalyst Supports for Oxygen Reduction. *Acs Applied Energy Materials* 2 (2019) 5446-5455 <https://doi.org/10.1021/acsaem.9b00506>.
- [5] Bukka, S.; Badam, R.; Vedarajan, R.; Matsumi, N. Photo-generation of ultra-small Pt nanoparticles on carbon-titanium dioxide nanotube composites: A novel strategy for efficient ORR activity with low Pt content. *International Journal of Hydrogen Energy* 44 (2019) 4745-4753 <https://doi.org/10.1016/j.ijhydene.2019.01.004>.
- [6] Xia, B. Y.; Ng, W. T.; Wu, H. B.; Wang, X.; Lou, X. W. D. Self-Supported Interconnected Pt Nanoassemblies as Highly Stable Electrocatalysts for Low-Temperature Fuel Cells. *Angewandte Chemie* 124 (2012) 7325-7328 <https://doi.org/10.1002/ange.201201553>.
- [7] Yao, C. H.; Li, F.; Li, X.; Xia, D. G. Fiber-like nanostructured  $Ti_4O_7$  used as durable fuel cell catalyst support in oxygen reduction catalysis. *Journal of Materials Chemistry* 22 (2012) 16560-16565 <https://doi.org/10.1039/c2jm32866f>.
- [8] Tang, X. J.; Zeng, Y. C.; Cao, L. S.; Yang, L. M.; Wang, Z. Q.; Fang, D. H.; Gao, Y. Y.; Shao, Z. G.; Yi, B. L. Anchoring ultrafine Pt nanoparticles on the 3D hierarchical self-assembly of graphene/functionalized carbon black as a highly efficient oxygen reduction catalyst for PEMFCs. *Journal of Materials Chemistry A* 6 (2018) 15074-15082 <https://doi.org/10.1039/c8ta02453g>.
- [9] Suh, W. K.; Ganesan, P.; Son, B.; Kim, H.; Shanmugam, S. Graphene supported Pt-Ni nanoparticles for oxygen reduction reaction in acidic electrolyte. *International Journal of Hydrogen Energy* 41 (2016) 12983-12994 <https://doi.org/10.1016/j.ijhydene.2016.04.090>.
- [10] Nakamoto, T.; Motomiya, K. I.; Yokoyama, S.; Takahashi, H. Precursor-templated synthesis of thermodynamically unfavored platinum nanoplates for the oxygen reduction reaction. *Dalton transactions* 49 (2020) 15837-15842 <https://doi.org/10.1039/d0dt03338c>.
